# Supplementary material
Source: PubMed Central journal article supplement (PMC3193468)
Supplement: cr2011115x2.pdf [file cr2011115x2.pdf]

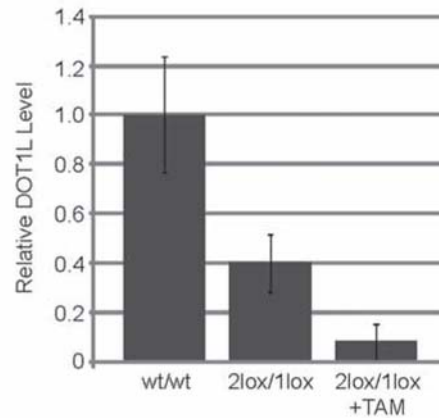

**Supplementary information, Figure S1** Efficient *in vivo* recombination upon TAM administration.

Bone marrow cells were harvested from treated or untreated DOT1L<sup>+/+</sup>/Cre-ER or DOT1L<sup>2lox/1lox</sup>/Cre-ER mice. Total RNA was purified using RNeasy (Qiagen), reverse transcription using Improm II (Promega), and qPCR using SybrGreenER Master Mix (Invitrogen). DOT1L forward primer (CAGAGGATGACCTGTTTGTCG) and reverse primer (CATCCACTTCCTGAACTCTCG), normalized to Gapdh.
