# Supplementary material
Source: PubMed Central journal article supplement (PMC3193468)
Supplement: cr2011115x3.pdf [file cr2011115x3.pdf]

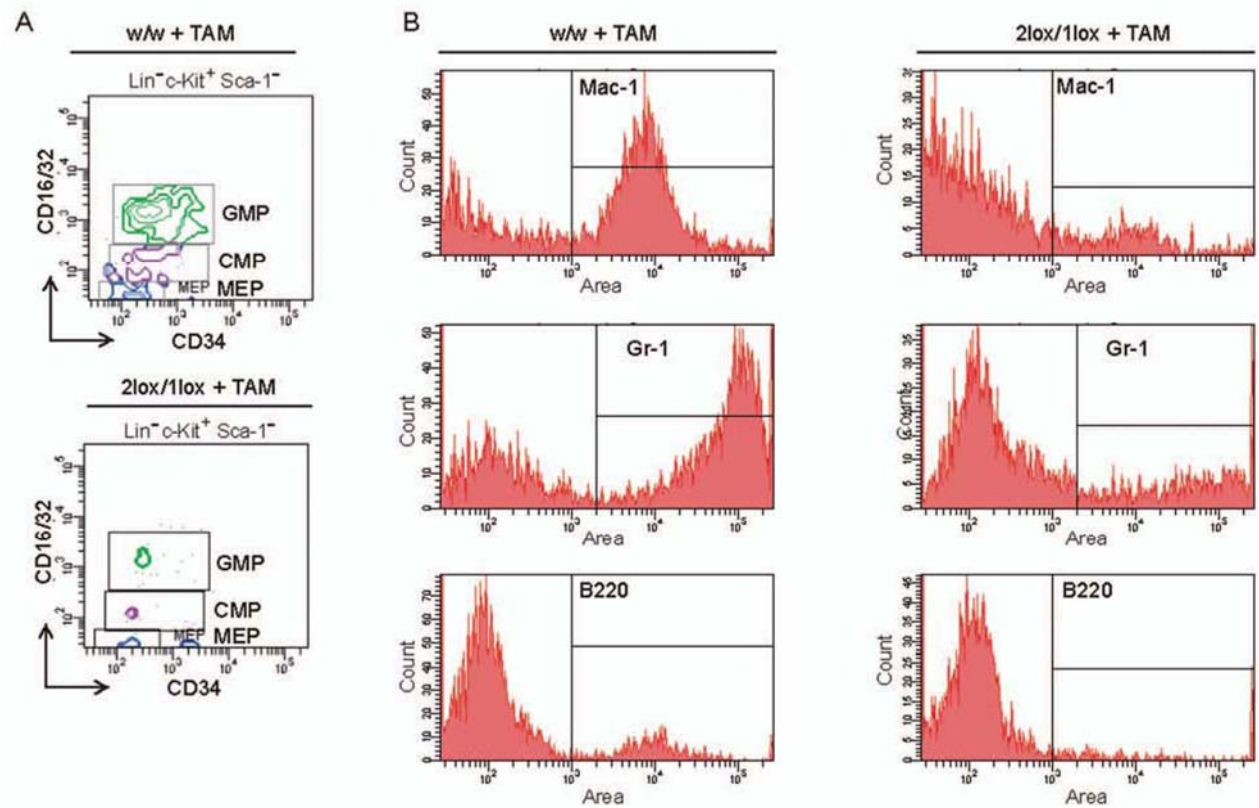

**Supplementary information, Figure S2** TAM induced deletion of DOT1L results in loss of CMP, GMP, and MEP in the bone marrow.

A. Representative plots from FACS analysis show that committed progenitor lineages –CMP, GMP, and MEP – are reduced in TAM-treated DOT1L2lox/1lox/Cre-ER mice (2lox/1lox + TAM) compared to TAM-treated wild type DOT1L+/+/Cre-ER mice (wt/wt + TAM). B. Representative histograms from FACS analysis show depletion of differentiated cells – macrophages (Mac-1), granulocytes (Gr-1), and B cells (B220) – in TAM-treated DOT1L2lox/1lox/Cre-ER mice (2lox/1lox + TAM) compared to TAM-treated wild type DOT1L+/+/Cre-ER mice (wt/wt + TAM).
