# Supplementary material
Source: PubMed Central journal article supplement (PMC3193468)
Supplement: cr2011115x5.pdf [file cr2011115x5.pdf]

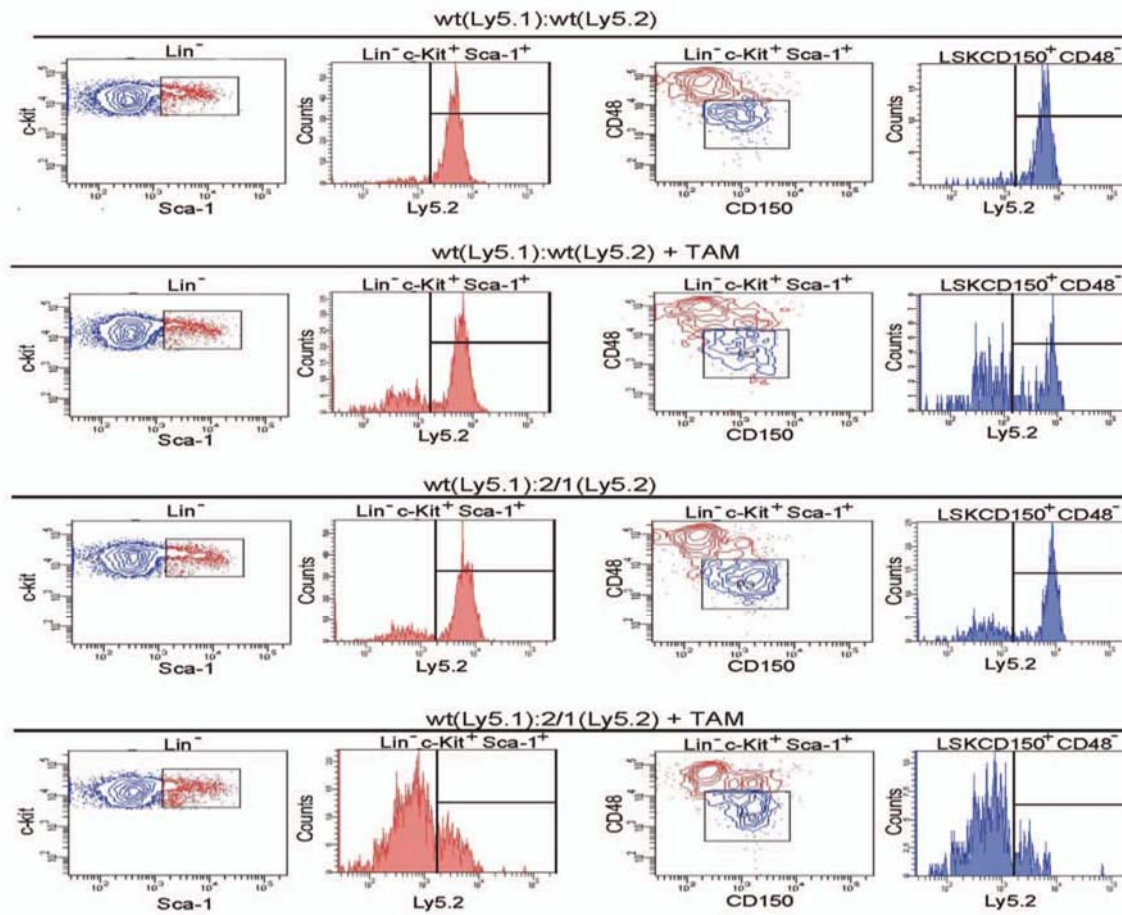

**Supplementary information, Figure S4** DOT1L deletion results in cell autonomous loss of hematopoietic stem cells.

Bone marrow competition assays were performed as in Figure S3. FACS analysis of bone marrow cells stained for Lin<sup>-</sup>, c-Kit, Sca1, CD150, and CD48 was then performed. The results indicate that the percentage of Ly5.2 positive HSCs and LT-HSCs is reduced upon DOT1L deletion.
