# Supplementary material
Source: PubMed Central journal article supplement (PMC3193468)
Supplement: cr2011115x6.pdf [file cr2011115x6.pdf]

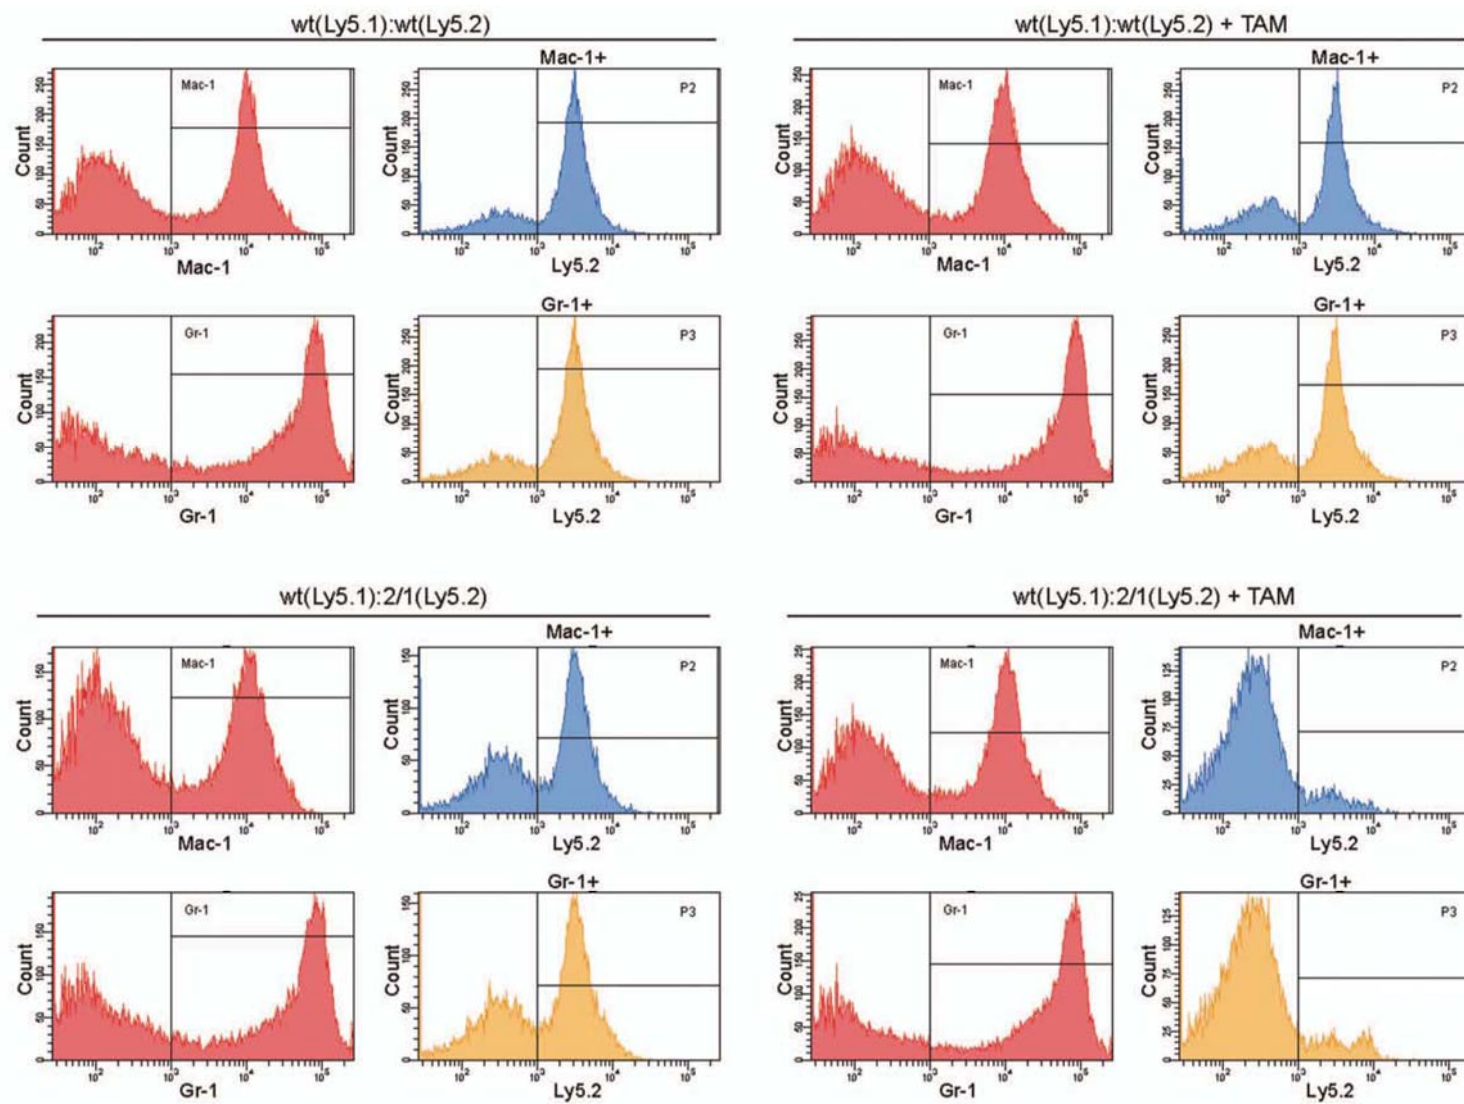

**Supplementary information, Figure S5** Loss of macrophage and granulocyte populations in bone marrow upon DOT1L deletion is cell autonomous.

Bone marrow competition assays were performed by co-transplanting wild type Ly5.1 Cre-negative cells with DOT1L<sup>+/+</sup>/Cre-ER Ly5.2 cells (wt) or DOT1L<sup>2lox/1lox</sup>/Cre-ER Ly5.2 cells (2/1) into wild type Ly5.1 mice. The percentage of Ly5.2 cells in gated Mac-1 positive (blue) and Gr-1 positive (yellow) populations is significantly reduced only when DOT1L is deleted, wt(Ly5.1):2/1(Ly5.2) + TAM.
