# Supplementary material
Source: PubMed Central journal article supplement (PMC3193468)
Supplement: cr2011115x7.pdf [file cr2011115x7.pdf]

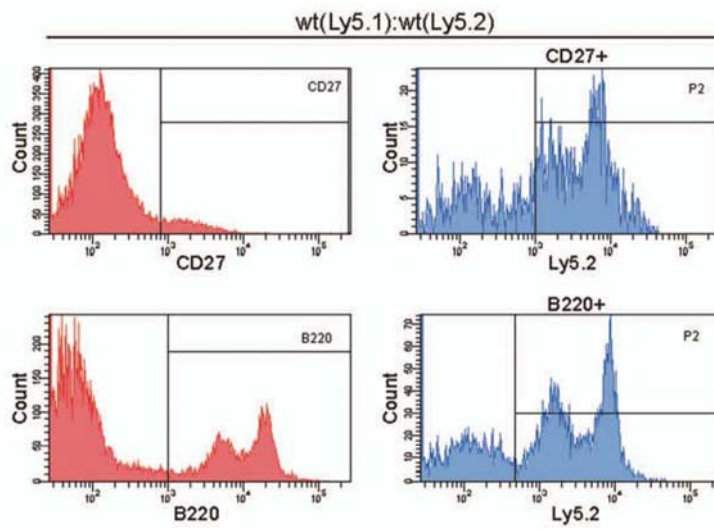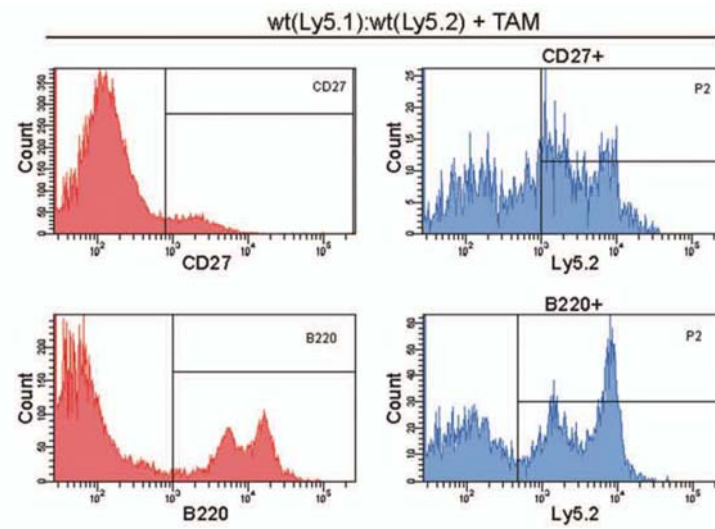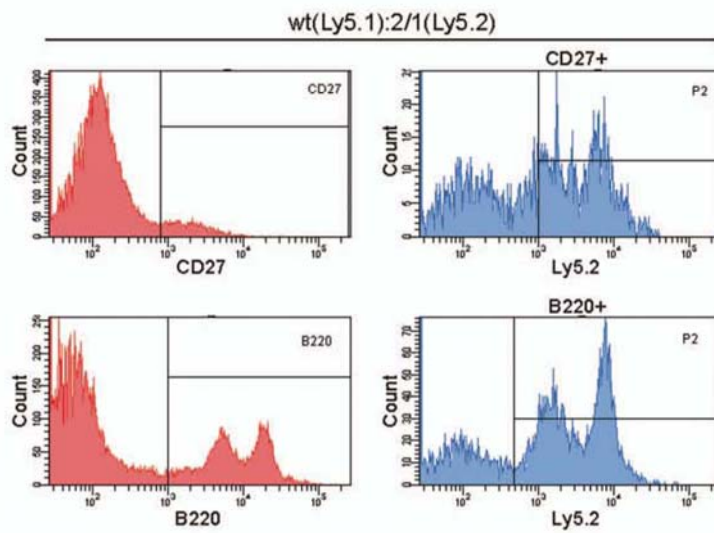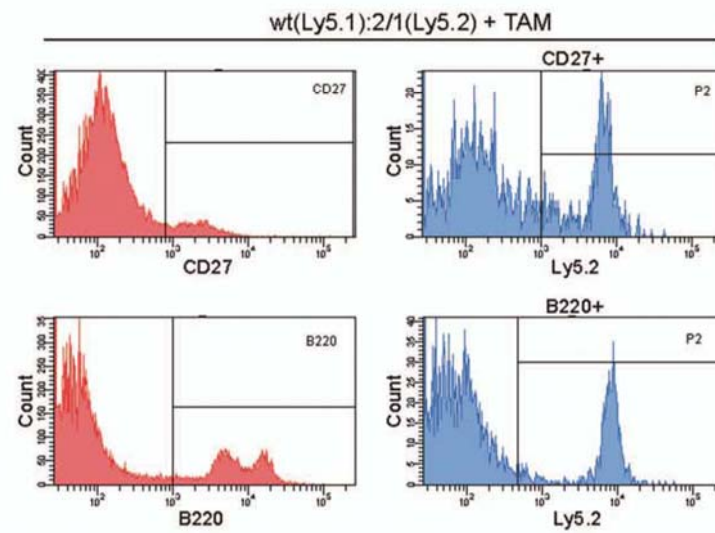

**Supplementary information, Figure S6** Loss of B cell and T cell populations in bone marrow upon DOT1L depletion is cell autonomous.

Bone marrow competition assays were performed by co-transplanting wild type Ly5.1 Cre-negative cells with DOT1L<sup>+/+</sup>/Cre-ER Ly5.2 cells (wt) or DOT1L<sup>2lox/1lox</sup>/Cre-ER Ly5.2 cells (2/1) into wild type Ly5.1 mice. The percentage of Ly5.2 cells in gated B220 positive (B cells) and CD27 positive (mature T cells) populations is significantly reduced only when DOT1L is deleted, wt(Ly5.1):2/1(Ly5.2) + TAM.
